# Supplementary material for: Theoretical calculation assisted materials screening of BiOX (X = F, Cl, Br, I) for electrochemical absorption of cesium ions
Source: Royal Society of Chemistry journal article supplement (doi:10.1039/d0cp06195f), 2021-01-01
Supplement: d0cp06195f1.pdf [file d0cp06195f1.pdf]

## Supporting Information

### Theoretical calculation assisted materials screening of BiOX (X = F, Cl, Br, I) for electrochemical absorption of cesium ions

*Dongcheng Lin<sup>1‡</sup>, Huixin Zhang<sup>1‡</sup>, Xiaowei An<sup>2</sup>, Lutong Chang<sup>1</sup>, Ayman Alameen<sup>1</sup>,  
Shengqi Ding<sup>1</sup>, Xiao Du<sup>1\*</sup> and Xiaogang Hao<sup>1\*</sup>*

*<sup>1</sup>Department of Chemical Engineering, Taiyuan University of Technology, Taiyuan  
030024, P. R. China*

*<sup>2</sup>Graduate School of Science and Technology, Hirosaki University, 1-Bunkyocho,  
Hirosaki 036-8560, Japan*

\*Corresponding author:

Xiao Du: [duxiao@tyut.edu.cn](mailto:duxiao@tyut.edu.cn);

Xiaogang Hao: [xghao@tyut.edu.cn](mailto:xghao@tyut.edu.cn)

‡These authors contributed equally to this work and should be regarded as co-first authors.

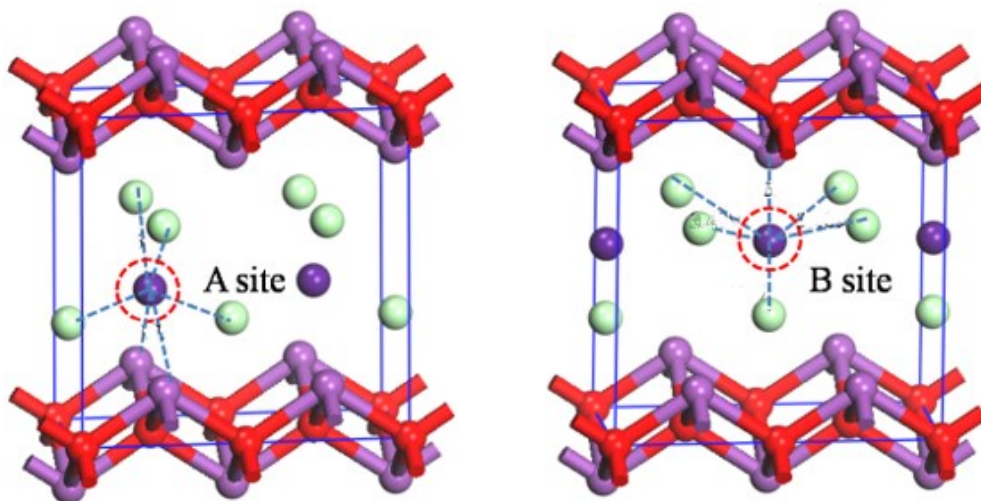

**Fig. S1** The difference of A site and B site in BiOX crystal.

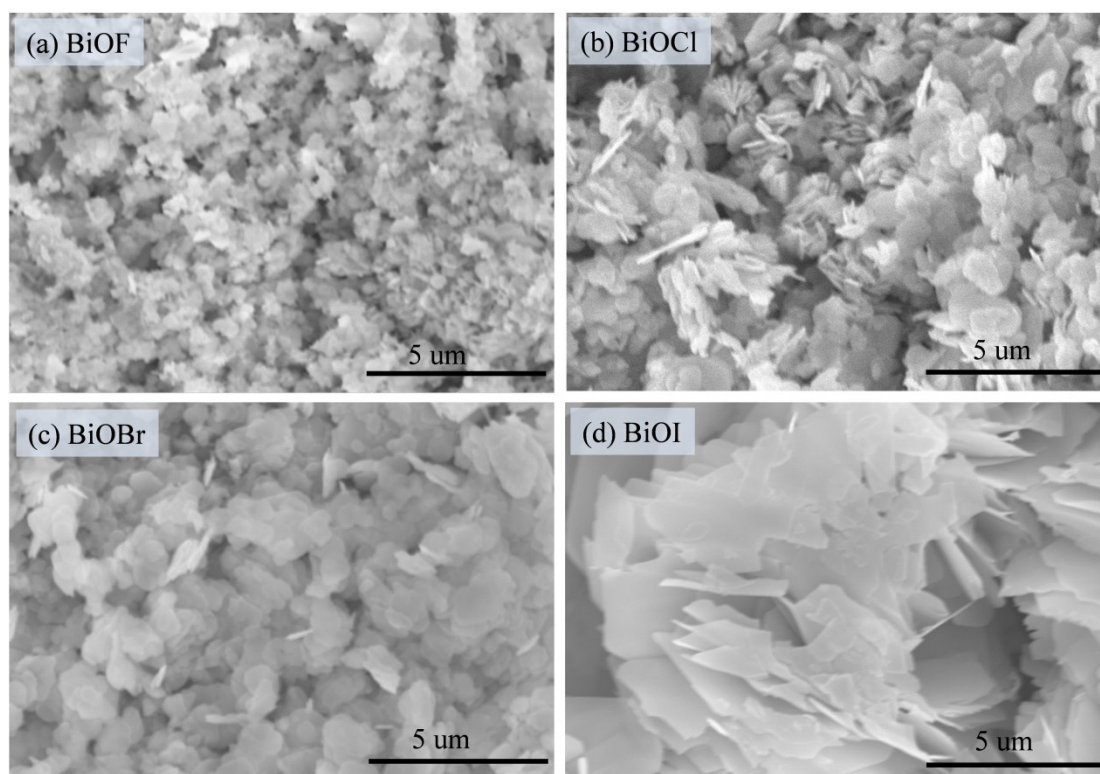

**Fig. S2** The SEM images of (a) BiOF, (b) BiOCl, (c) BiOBr, and (d) BiOI.

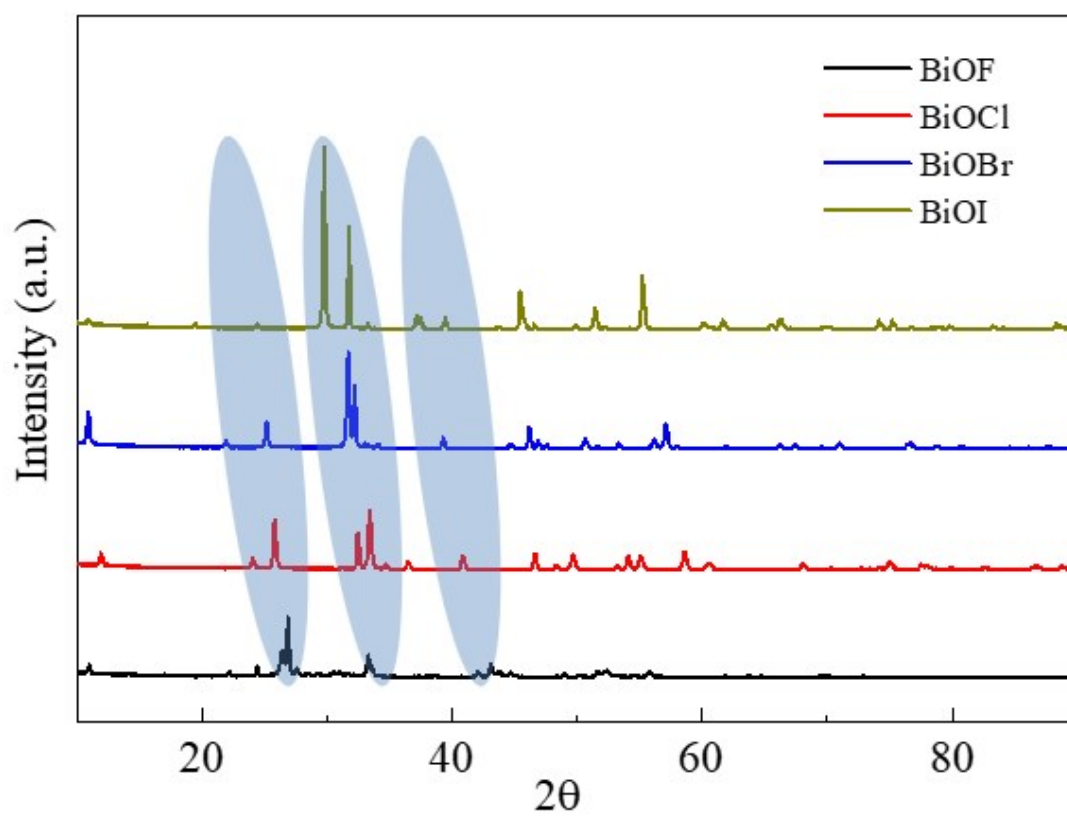

**Fig. S3** The XRD patterns of BiOF, BiOCl, BiOBr, and BiOI.

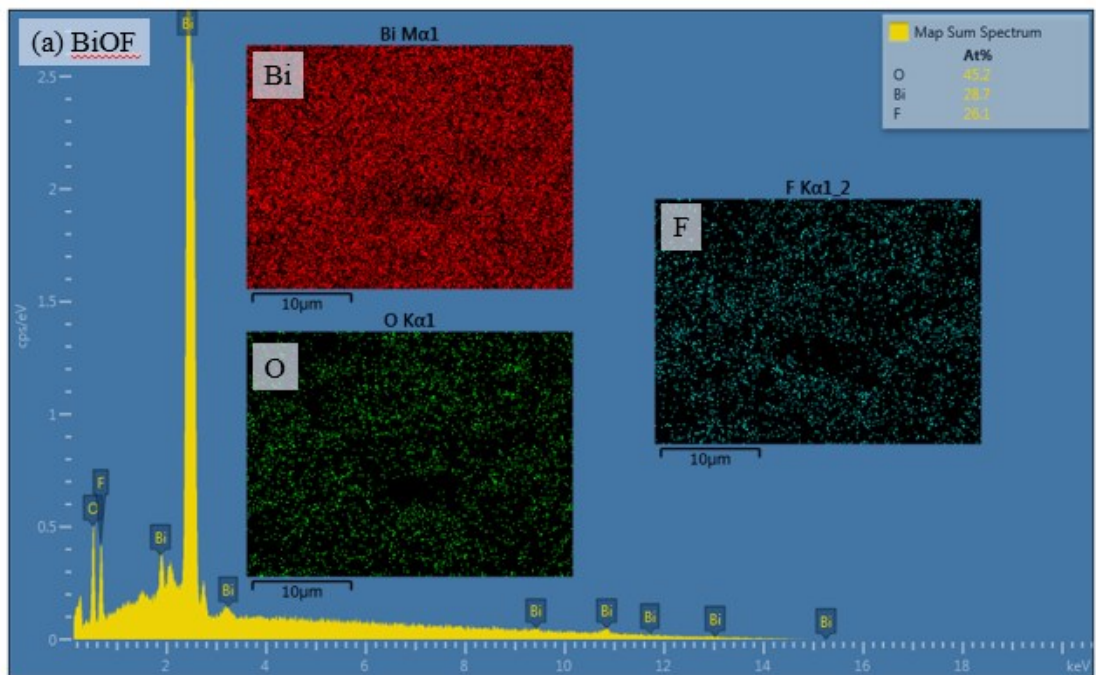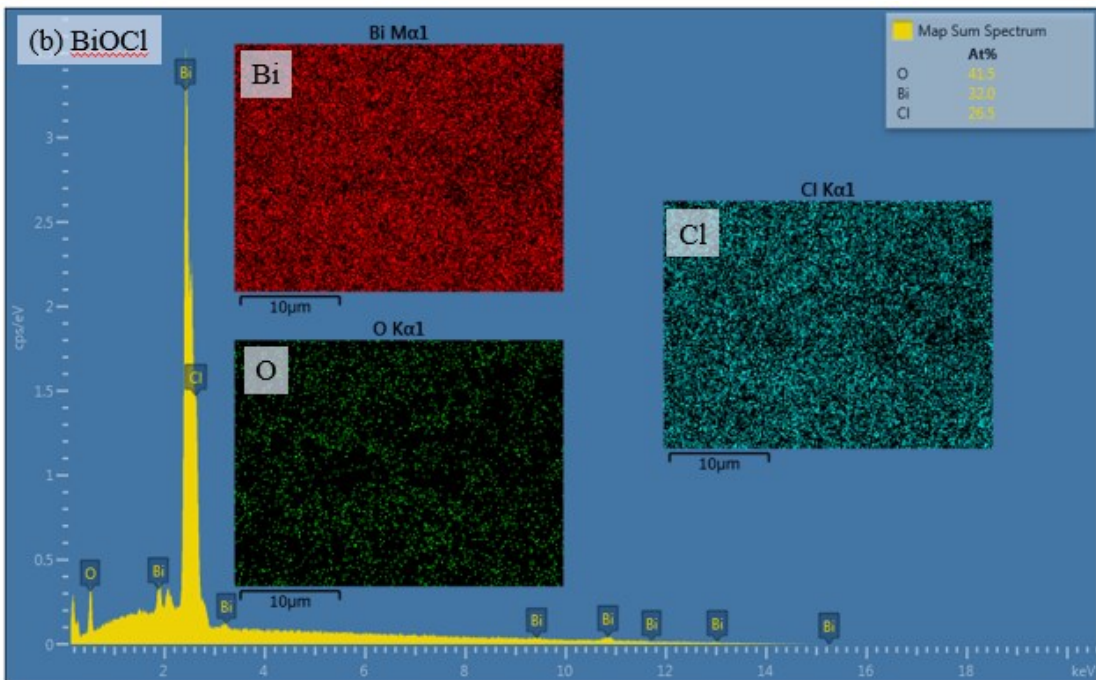

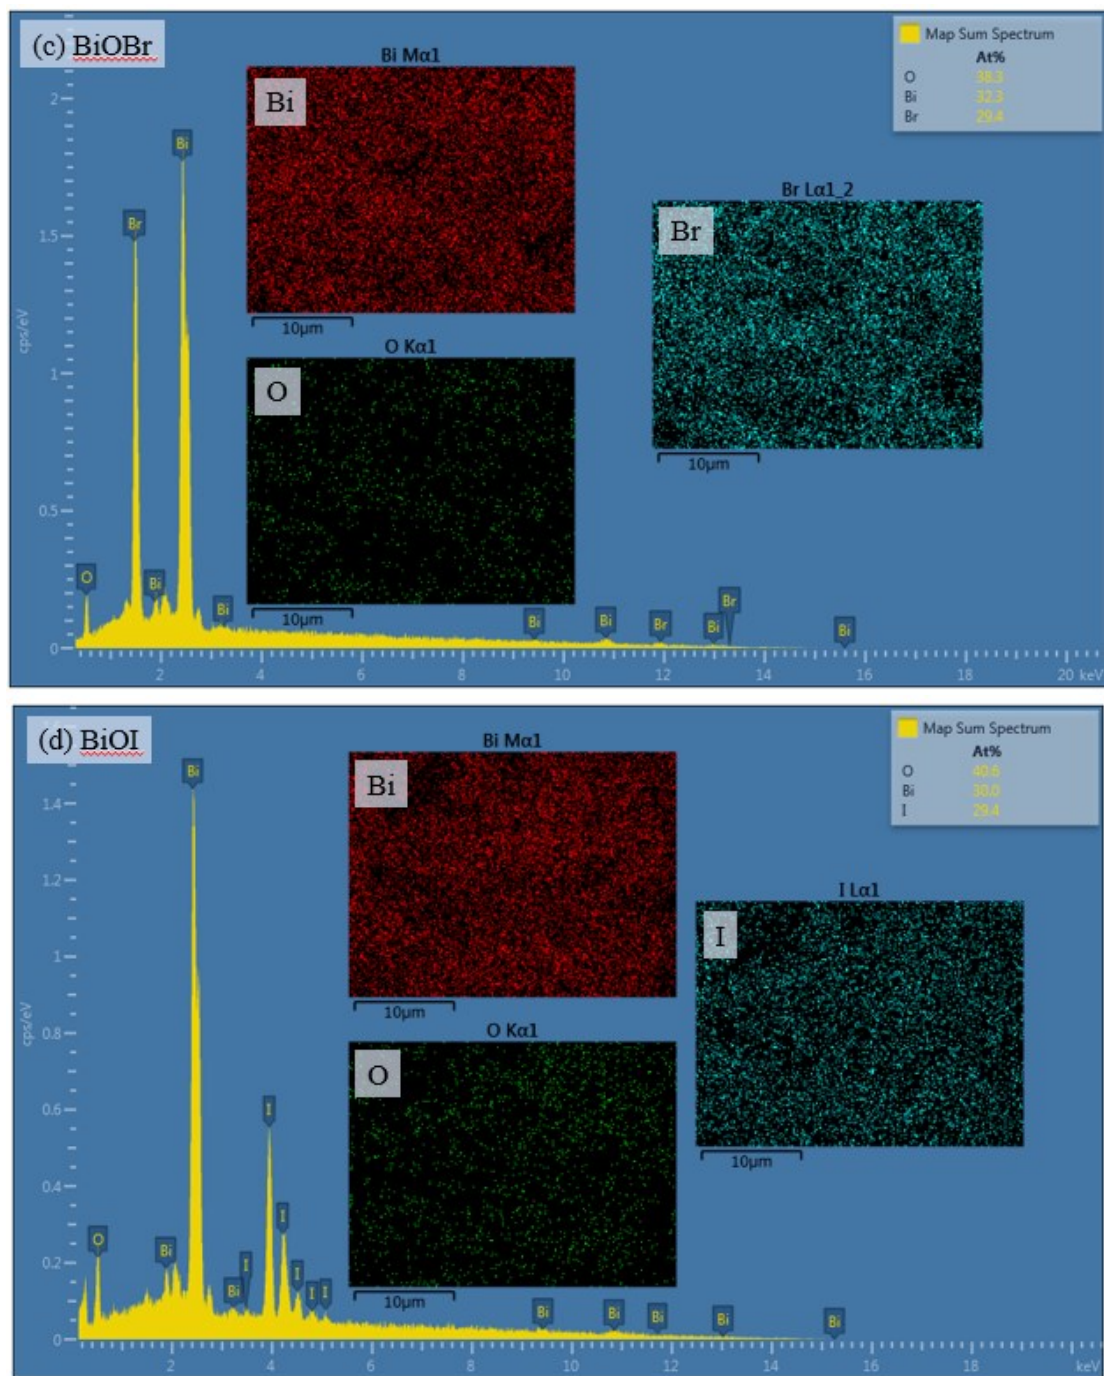

**Fig. S4** The EDS results of (a) BiOF, (b) BiOCl, (c) BiOBr, and (d) BiOI.
